# Supplementary material for: Meta-analysis of the association between NLRP1 polymorphisms and the susceptibility to vitiligo and associated autoimmune diseases
Source: Oncotarget. 2017 Sep 22;8(50):88179–88. doi: 10.18632/oncotarget.21165 (PMC5675702; doi:10.18632/oncotarget.21165)
Supplement: Supplementary file 1 [file oncotarget-08-88179-s001.pdf]

# Meta-analysis of the association between *NLRP1* polymorphisms and the susceptibility to vitiligo and associated autoimmune diseases

## SUPPLEMENTARY MATERIALS

**Supplementary Table 1: PRISMA 2009 checklist.** See Supplementary\_Table\_1

**Supplementary Table 2: Characteristics of included case-control studies.** See Supplementary\_Table\_2

**Supplementary Table 3: NOS-based quality assessment**

| Number | First author | Year | NOS score | Term 1 | Term 2 | Term 3 | Term 4 | Term 5 | Term 6 | Term 7 | Term 8 | Term 9 |
|--------|--------------|------|-----------|--------|--------|--------|--------|--------|--------|--------|--------|--------|
| 1      | Alkhateeb    | 2013 | 8         | 1      | 1      | 1      | 1      | 1      | 0      | 1      | 1      | 1      |
| 2      | Alkhateeb    | 2010 | 8         | 0      | 1      | 1      | 1      | 1      | 1      | 1      | 1      | 1      |
| 3      | Dieudé       | 2011 | 6         | 0      | 1      | 1      | 1      | 1      | 0      | 1      | 1      | 0      |
| 4      | Dwivedi      | 2013 | 9         | 1      | 1      | 1      | 1      | 1      | 1      | 1      | 1      | 1      |
| 5      | Goh          | 2017 | 7         | 0      | 1      | 1      | 1      | 1      | 1      | 0      | 1      | 1      |
| 6      | Hinks        | 2013 | 7         | 0      | 1      | 1      | 1      | 1      | 0      | 1      | 1      | 1      |
| 7      | Horie        | 2011 | 8         | 1      | 1      | 1      | 1      | 1      | 0      | 1      | 1      | 1      |
| 8      | Jin          | 2007 | 8         | 1      | 1      | 1      | 1      | 0      | 1      | 1      | 1      | 1      |
| 9      | Li           | 2016 | 8         | 1      | 1      | 1      | 1      | 1      | 1      | 1      | 1      | 0      |
| 10     | Magitta      | 2009 | 7         | 1      | 1      | 1      | 1      | 1      | 0      | 1      | 1      | 0      |
| 11     | Pontillo     | 2010 | 8         | 1      | 1      | 1      | 1      | 1      | 0      | 1      | 1      | 1      |
| 12     | Pontillo     | 2012 | 8         | 1      | 1      | 1      | 1      | 1      | 0      | 1      | 1      | 1      |
| 13     | Pontillo     | 2015 | 7         | 1      | 1      | 1      | 1      | 1      | 0      | 1      | 1      | 0      |
| 14     | Sui          | 2012 | 8         | 1      | 1      | 1      | 1      | 1      | 1      | 1      | 1      | 0      |
| 15     | Sun          | 2013 | 5         | 0      | 1      | 0      | 0      | 1      | 1      | 1      | 1      | 0      |
| 16     | Wang         | 2015 | 9         | 1      | 1      | 1      | 1      | 1      | 1      | 1      | 1      | 1      |
| 17     | Xie          | 2008 | 7         | 1      | 1      | 1      | 1      | 1      | 0      | 1      | 1      | 0      |
| 18     | Zurawek      | 2011 | 8         | 0      | 1      | 1      | 1      | 1      | 1      | 1      | 1      | 1      |
| 19     | Zurawek      | 2010 | 7         | 0      | 1      | 1      | 1      | 1      | 0      | 1      | 1      | 1      |

NOS, Newcastle-Ottawa scale; Term 1, Definition of cases; Term 2, Representativeness of cases; Term 3, Selection of controls; Term 4, Definition of controls; Term 5, Important factors of comparability; Term 6, Other factors of comparability; Term 7, secure record of exposure; Term 8, same genotyping method; Term 9, Non-response rate.

**Supplementary Table 4: Publication bias assessment for vitiligo meta-analysis**

| SNP               | Models          | Begg's test |            | Egger's test |             |
|-------------------|-----------------|-------------|------------|--------------|-------------|
|                   |                 | $z$         | $P_{Begg}$ | $t$          | $P_{Egger}$ |
| <b>rs12150220</b> | T vs. A         | 1.04        | 0.296      | -2.88        | 0.213       |
|                   | TT vs. AA       | 0.00        | 1.000      | -1.51        | 0.372       |
|                   | AT vs. AA       | 0.00        | 1.000      | 0.30         | 0.812       |
|                   | AT+TT vs. AA    | 1.04        | 0.296      | -6.13        | 0.103       |
|                   | TT vs. AA+AT    | 0.00        | 1.000      | -1.31        | 0.414       |
|                   | carrier T vs. A | 1.04        | 0.296      | -3.46        | 0.179       |
| <b>rs2670660</b>  | G vs. A         | 0.24        | 0.806      | -0.60        | 0.591       |
|                   | GG vs. AA       | 0.73        | 0.462      | -0.58        | 0.605       |
|                   | AG vs. AA       | -0.24       | 1.000      | 0.26         | 0.813       |
|                   | AG+GG vs. AA    | -0.24       | 1.000      | 0.04         | 0.973       |
|                   | GG vs. AA+AG    | 0.24        | 0.806      | -1.39        | 0.259       |
|                   | carrier G vs. A | -0.24       | 1.000      | -0.61        | 0.584       |
| <b>rs6502867</b>  | C vs. T         | -0.24       | 1.000      | -1.50        | 0.231       |
|                   | CC vs. TT       | -0.24       | 1.000      | -1.29        | 0.289       |
|                   | TC vs. TT       | 0.24        | 0.806      | -1.16        | 0.330       |
|                   | TC+CC vs. TT    | 0.24        | 0.806      | -1.28        | 0.290       |
|                   | CC vs. TT+TC    | 0.24        | 0.806      | -1.37        | 0.263       |
|                   | carrier C vs. T | 0.24        | 0.806      | -1.53        | 0.223       |

$P_{Begg}$ ,  $P$  value of Begg's test;  $P_{Egger}$ ,  $P$  value of Egger's test.

**Supplementary Table 5: Heterogeneity and publication bias assessment for meta-analysis of vitiligo-associated autoimmune diseases**

| SNP               | Models          | Heterogeneity  |                                   |        | Begg's test |                          | Egger's test |                          |
|-------------------|-----------------|----------------|-----------------------------------|--------|-------------|--------------------------|--------------|--------------------------|
|                   |                 | I <sup>2</sup> | <i>P</i> <sub>heterogeneity</sub> | M      | <i>z</i>    | <i>P</i> <sub>Begg</sub> | <i>t</i>     | <i>P</i> <sub>Begg</sub> |
| <b>rs12150220</b> | T vs. A         | 47.9%          | 0.011                             | Random | 0.49        | 0.624                    | 0.71         | 0.489                    |
|                   | TT vs. AA       | 47.4%          | 0.014                             | Random | 0.23        | 0.820                    | 0.49         | 0.631                    |
|                   | AT vs. AA       | 19.8%          | 0.213                             | Fixed  | 1.33        | 0.184                    | 1.99         | 0.063                    |
|                   | AT+TT vs. AA    | 36.8%          | 0.055                             | Random | 1.12        | 0.263                    | 1.62         | 0.123                    |
|                   | TT vs. AA+AT    | 36.9%          | 0.059                             | Random | 0.00        | 1.000                    | -0.37        | 0.713                    |
|                   | carrier T vs. A | 0.0%           | 0.828                             | Fixed  | 0.28        | 0.780                    | 0.67         | 0.514                    |
| <b>rs2670660</b>  | G vs. A         | 64.1%          | 0.003                             | Random | 1.79        | 0.074                    | 2.16         | 0.063                    |
|                   | GG vs. AA       | 94.1%          | <0.001                            | Random | 0.72        | 0.474                    | 0.94         | 0.373                    |
|                   | AG vs. AA       | 24.8%          | 0.215                             | Fixed  | 2.15        | <b>0.032</b>             | 2.56         | <b>0.034</b>             |
|                   | AG+GG vs. AA    | 49.4%          | 0.038                             | Random | 2.50        | <b>0.012</b>             | 2.71         | <b>0.027</b>             |
|                   | GG vs. AA+AG    | 57.4%          | 0.012                             | Random | 1.25        | 0.210                    | 1.39         | 0.202                    |
|                   | carrier G vs. A | 0.514          | 0.0%                              | Fixed  | 1.79        | 0.074                    | 2.18         | 0.061                    |
| <b>rs6502867</b>  | C vs. T         | 0.0%           | 0.590                             | Fixed  | 2.63        | <b>0.009</b>             | -3.15        | <b>0.005</b>             |
|                   | CC vs. TT       | 0.0%           | 0.856                             | Fixed  | 1.11        | 0.266                    | -1.43        | 0.172                    |
|                   | TC vs. TT       | 16.3%          | 0.246                             | Fixed  | 1.30        | 0.194                    | -1.81        | 0.086                    |
|                   | TC+CC vs. TT    | 5.8%           | 0.384                             | Fixed  | 2.02        | <b>0.043</b>             | -2.31        | <b>0.032</b>             |
|                   | CC vs. TT+TC    | 0.0%           | 0.770                             | Fixed  | 0.87        | 0.387                    | -1.34        | 0.199                    |
|                   | carrier C vs. T | 0.0%           | 0.931                             | Fixed  | 2.99        | <b>0.003</b>             | -3.25        | <b>0.004</b>             |

*P*<sub>heterogeneity</sub>, *P* value of Cochrane's Q statistic for the assessment of heterogeneity; M, statistical model; *P*<sub>Begg</sub>, *P* value of Begg's test;  
*P*<sub>Egger</sub>, *P* value of Egger's test.

**Supplementary Table 6: Pooled analyses of the association between NLRP1 rs2670660 polymorphism and susceptibility to vitiligo-associated autoimmune diseases**

| Models                 | Stratification                 | case/control (N) | OR [95 % CI]     | <i>P</i> <sub>association</sub> |
|------------------------|--------------------------------|------------------|------------------|---------------------------------|
| <b>G vs. A</b>         | overall                        | 3,732/8,978 (10) | 1.12 [1.01~1.25] | <b>0.034</b>                    |
|                        | Caucasian                      | 3,098/8,250 (6)  | 1.02 [0.96~1.09] | 0.504                           |
|                        | <i>P</i> <sub>HWE</sub> > 0.05 | 1,813/2,171 (7)  | 1.22 [1.02~1.47] | <b>0.029</b>                    |
|                        | <i>P</i> <sub>HWE</sub> < 0.05 | 1,919/6,807 (3)  | 1.02 [0.94~1.09] | 0.661                           |
|                        | T1D                            | 1,501/2,715 (3)  | 1.02 [0.93~1.11] | 0.699                           |
| <b>GG vs. AA</b>       | overall                        | 3,732/8,978 (10) | 1.08 [0.65~1.80] | 0.762                           |
|                        | Caucasian                      | 3,098/8,250 (6)  | 0.66 [0.37~1.19] | 0.170                           |
|                        | <i>P</i> <sub>HWE</sub> > 0.05 | 1,813/2,171 (7)  | 1.58 [0.99~2.53] | 0.057                           |
|                        | <i>P</i> <sub>HWE</sub> < 0.05 | 1,919/6,807 (3)  | 0.48 [0.22~1.06] | 0.069                           |
|                        | T1D                            | 1,501/2,715 (3)  | 1.13 [0.83~1.54] | 0.437                           |
| <b>AG vs. AA</b>       | overall                        | 3,732/8,978 (10) | 1.05 [0.96~1.15] | 0.284                           |
|                        | Caucasian                      | 3,098/8,250 (6)  | 1.00 [0.91~1.11] | 0.927                           |
|                        | <i>P</i> <sub>HWE</sub> > 0.05 | 1,813/2,171 (7)  | 1.12 [0.96~1.29] | 0.141                           |
|                        | <i>P</i> <sub>HWE</sub> < 0.05 | 1,919/6,807 (3)  | 1.01 [0.90~1.14] | 0.841                           |
|                        | T1D                            | 1,501/2,715 (3)  | 0.95 [0.83~1.10] | 0.527                           |
| <b>AG+GG vs. AA</b>    | overall                        | 3,732/8,978 (10) | 1.13 [0.99~1.30] | 0.078                           |
|                        | Caucasian                      | 3,098/8,250 (6)  | 1.02 [0.93~1.12] | 0.728                           |
|                        | <i>P</i> <sub>HWE</sub> > 0.05 | 1,813/2,171 (7)  | 1.28 [1.00~1.65] | 0.053                           |
|                        | <i>P</i> <sub>HWE</sub> < 0.05 | 1,919/6,807 (3)  | 1.02 [0.91~1.14] | 0.750                           |
|                        | T1D                            | 1,501/2,715 (3)  | 0.98 [0.86~1.13] | 0.790                           |
| <b>GG vs. AA+AG</b>    | overall                        | 3,732/8,978 (10) | 1.18 [0.99~1.40] | 0.071                           |
|                        | Caucasian                      | 3,098/8,250 (6)  | 1.05 [0.94~1.17] | 0.409                           |
|                        | <i>P</i> <sub>HWE</sub> > 0.05 | 1,813/2,171 (7)  | 1.34 [1.01~1.76] | <b>0.040</b>                    |
|                        | <i>P</i> <sub>HWE</sub> < 0.05 | 1,919/6,807 (3)  | 1.03 [0.88~1.20] | 0.734                           |
|                        | T1D                            | 1,501/2,715 (3)  | 1.09 [0.92~1.28] | 0.309                           |
| <b>carrier G vs. A</b> | overall                        | 3,732/8,978 (10) | 1.05 [0.98~1.12] | 0.179                           |
|                        | Caucasian                      | 3,098/8,250 (6)  | 1.01 [0.94~1.09] | 0.707                           |
|                        | <i>P</i> <sub>HWE</sub> > 0.05 | 1,813/2,171 (7)  | 1.10 [0.99~1.22] | 0.070                           |
|                        | <i>P</i> <sub>HWE</sub> < 0.05 | 1,919/6,807 (3)  | 1.01 [0.93~1.10] | 0.803                           |
|                        | T1D                            | 1,501/2,715 (3)  | 1.01 [0.91~1.12] | 0.849                           |

HWE, Hardy-weinberg equilibrium; T1D, Type 1 diabetes; OR, odds ratio; CI, confidence interval; *P*<sub>association</sub>, *P* value of Association Test; N, Number of included case-control studies.

**Supplementary Table 7: Pooled analyses of the association between NLRP1 rs6502867 polymorphism and susceptibility to vitiligo-associated autoimmune diseases. See Supplementary\_Table\_7**

**Supplementary Table 8: Pooled analyses of the association between *NLRP1* rs2670660/rs12150220 haplotype and susceptibility to vitiligo-associated autoimmune diseases**

| haplotypes    |                | Heterogeneity  |                            |        | case/control<br>(N) | Association Test | Begg's test              |       | Egger's test      |       |                    |
|---------------|----------------|----------------|----------------------------|--------|---------------------|------------------|--------------------------|-------|-------------------|-------|--------------------|
| rs2670660 A/G | rs12150220 A/T | I <sup>2</sup> | P <sub>heterogeneity</sub> | M      |                     | OR [95 % CI]     | P <sub>association</sub> | z     | P <sub>Begg</sub> | t     | P <sub>Egger</sub> |
| A             | A              | 69.6%          | 0.011                      | Random | 701/1,044 (5)       | 0.97 [0.65~1.43] | 0.866                    | 0.73  | 0.462             | 2.56  | 0.083              |
| G             | T              | 0.0%           | 0.634                      | Fixed  | 563/1,351 (5)       | 1.02 [0.82~1.28] | 0.864                    | -0.24 | 1.000             | -0.42 | 0.700              |
| G             | A              | 70.4%          | 0.009                      | Random | 563/1,351 (5)       | 1.35 [0.81~2.25] | 0.244                    | -0.24 | 1.000             | -0.03 | 0.976              |
| A             | T              | 63.4%          | 0.027                      | Random | 563/1,351 (5)       | 1.08 [0.58~2.04] | 0.800                    | 0.24  | 0.806             | 0.11  | 0.919              |

*Pheterogeneity*, *P* value of Cochrane's Q statistic; M, statistical model; N, Number of included case-control studies; OR, odds ratio; CI, confidence interval; *P*<sub>association</sub>, *P* value of Association Test; N, Number; *P*<sub>Begg</sub>, *P* value of Begg's test; *P*<sub>Egger</sub>, *P* value of Egger's test.

**Supplementary Table 9: Search terms used for meta-analysis (up to July 2017)**

| Database | Step | Search terms                                                                                                                                                                                                                                                                                                                                                                                                                                                  | Number of articles |
|----------|------|---------------------------------------------------------------------------------------------------------------------------------------------------------------------------------------------------------------------------------------------------------------------------------------------------------------------------------------------------------------------------------------------------------------------------------------------------------------|--------------------|
| Pubmed   | #1   | “Polymorphism, Single Nucleotide”[Mesh]                                                                                                                                                                                                                                                                                                                                                                                                                       | 89,956             |
|          | #2   | (((((Nucleotide Polymorphism, Single) OR Nucleotide Polymorphisms, Single) OR Polymorphisms, Single Nucleotide) OR Single Nucleotide Polymorphisms) OR SNPs) OR Single Nucleotide Polymorphism                                                                                                                                                                                                                                                                | 117,052            |
|          | #3   | #2 OR #3                                                                                                                                                                                                                                                                                                                                                                                                                                                      | 117,052            |
|          | #4   | (((((((((NLRP1) OR NALP1) OR NLR Family Pyrin Domain Containing 1) OR (NACHT, LRR And PYD Domains-Containing Protein 1)) OR NACHT leucine-rich-repeat protein 1) OR death effector filament-forming Ced-4-like apoptosis) OR (NACHT, leucine rich repeat and PYD containing 1)) OR NLR family, pyrin domain containing 1) OR DEFCAP) OR DEFCAP-S) OR DEFCAP-L                                                                                                 | 1,949              |
|          | #5   | #3 AND #4                                                                                                                                                                                                                                                                                                                                                                                                                                                     | 97                 |
| WOS      | #1   | TOPIC: (Polymorphism, Single Nucleotide) OR TOPIC: (Nucleotide Polymorphism, Single) OR TOPIC: (Nucleotide Polymorphisms, Single) OR TOPIC: (Polymorphisms, Single Nucleotide) OR TOPIC: (Single Nucleotide Polymorphisms) OR TOPIC: (SNPs) OR TOPIC: (Single Nucleotide Polymorphism) OR TOPIC: (Mutation) OR TOPIC: (Mutations) OR TOPIC: (SNP) OR TOPIC: (Polymorphism) OR TOPIC: (Polymorphisms) OR TOPIC: (genetic variant) OR TOPIC: (genetic variants) | 1,617,571          |
|          | #2   | TOPIC: (NLRP1) OR TOPIC: (NALP1) OR TOPIC: (NLR Family Pyrin Domain Containing 1) OR TOPIC: (NACHT, LRR And PYD Domains-Containing Protein 1) OR TOPIC: (NACHT leucine-rich-repeat protein 1) OR TOPIC: (death effector filament-forming Ced-4-like apoptosis) OR TOPIC: (NACHT, leucine rich repeat and PYD containing 1) OR TOPIC: (NLR family, pyrin domain containing 1) OR TOPIC: (DEFCAP) OR TOPIC: (DEFCAP-S) OR TOPIC: (DEFCAP-L)                     | 1,118              |
|          | #3   | #1 AND #2                                                                                                                                                                                                                                                                                                                                                                                                                                                     | 274                |
| Embase   | #1   | ‘single nucleotide polymorphism’ OR ‘polymorphism, single nucleotide’                                                                                                                                                                                                                                                                                                                                                                                         | 141,613            |
|          | #2   | ‘nlrp1’ OR ‘nalp1’ OR ‘nlr family pyrin domain containing 1’ OR ‘nacht, lrr and pyd domains-containing protein 1’                                                                                                                                                                                                                                                                                                                                             | 566                |
|          | #3   | #2 AND #3                                                                                                                                                                                                                                                                                                                                                                                                                                                     | 70                 |
| CNKI     | #1   | NALP1; NLRP1; 基因多态性                                                                                                                                                                                                                                                                                                                                                                                                                                           | 9                  |
| WANFANG  | #1   | NALP1; NLRP1; 基因多态性                                                                                                                                                                                                                                                                                                                                                                                                                                           | 32                 |
| OVID     | #1   | (‘NLRP1’ or ‘NALP1’ or ‘NLR Family Pyrin Domain Containing 1’ or (‘NACHT, LRR and PYD Domains-Containing Protein 1’)).af.                                                                                                                                                                                                                                                                                                                                     | 2,027              |
|          | #2   | limit #1 to human [Limit not valid in Books@Ovid,Journals@Ovid,Your Journals@Ovid; records were retained]                                                                                                                                                                                                                                                                                                                                                     | 1,720              |
|          | #3   | (‘single nucleotide polymorphism’ or ‘polymorphism, single nucleotide’ or ‘polymorphism’ or ‘SNP’ or ‘mutation’).af.                                                                                                                                                                                                                                                                                                                                          | 2,653,055          |
|          | #4   | limit #3 to human [Limit not valid in Books@Ovid,Journals@Ovid,Your Journals@Ovid; records were retained]                                                                                                                                                                                                                                                                                                                                                     | 1,926,099          |
|          | #5   | #2 AND #4                                                                                                                                                                                                                                                                                                                                                                                                                                                     | 731                |
|          | #6   | ‘vitiligo’.af.                                                                                                                                                                                                                                                                                                                                                                                                                                                | 31,569             |
|          | #7   | limit #6 to human [Limit not valid in Books@Ovid,Journals@Ovid,Your Journals@Ovid; records were retained]                                                                                                                                                                                                                                                                                                                                                     | 28,931             |
|          | #8   | (‘autoimmune diseases’ or ‘Disease, Autoimmune’ or ‘Diseases, Autoimmune’ or ‘Autoimmune Disease’).af.                                                                                                                                                                                                                                                                                                                                                        | 349,179            |
|          | #9   | limit #8 to human [Limit not valid in Books@Ovid,Journals@Ovid,Your Journals@Ovid; records were retained]                                                                                                                                                                                                                                                                                                                                                     | 297,804            |
|          | #10  | #7 OR #9                                                                                                                                                                                                                                                                                                                                                                                                                                                      | 321,386            |
|          | #11  | #5 AND #10                                                                                                                                                                                                                                                                                                                                                                                                                                                    | 345                |
| Scopus   | #1   | (ALL (“NLRP1”) OR ALL (“NALP1”) OR ALL (“NLR Family Pyrin Domain Containing 1”) OR ALL (“NACHT, LRR And PYD Domains-Containing Protein 1”))                                                                                                                                                                                                                                                                                                                   | 2,063              |
|          | #2   | ( ALL(“single nucleotide polymorphism” ) OR ALL ( “single nucleotide polymorphism”) OR ALL (“SNP”) OR ALL (“mutation”))                                                                                                                                                                                                                                                                                                                                       | 2,331,599          |
|          | #3   | ( ALL(“vitiligo”) OR ALL ( “autoimmune diseases”) OR ALL (“Disease, Autoimmune”) OR ALL (“Autoimmune Disease”) OR ALL (“Diseases, Autoimmune”))                                                                                                                                                                                                                                                                                                               | 260,096            |
|          | #4   | #1 AND #2                                                                                                                                                                                                                                                                                                                                                                                                                                                     | 1,064              |
|          | #5   | #3 AND #4                                                                                                                                                                                                                                                                                                                                                                                                                                                     | 474                |
| Cochrane | #1   | NLRP1 or NALP1 or NLR Family Pyrin Domain Containing 1 or NACHT, LRR and PYD Domains-Containing Protein 1 (Word variations have been searched)                                                                                                                                                                                                                                                                                                                | 7                  |
|          | #2   | single nucleotide polymorphism or polymorphism or SNP or mutation                                                                                                                                                                                                                                                                                                                                                                                             | 13,706             |
|          | #3   | #1 AND #2                                                                                                                                                                                                                                                                                                                                                                                                                                                     | 5                  |

WOS, Web of Science; Embase, ExcerptaMedica Database; CNKI, China National Knowledge Infrastructure.

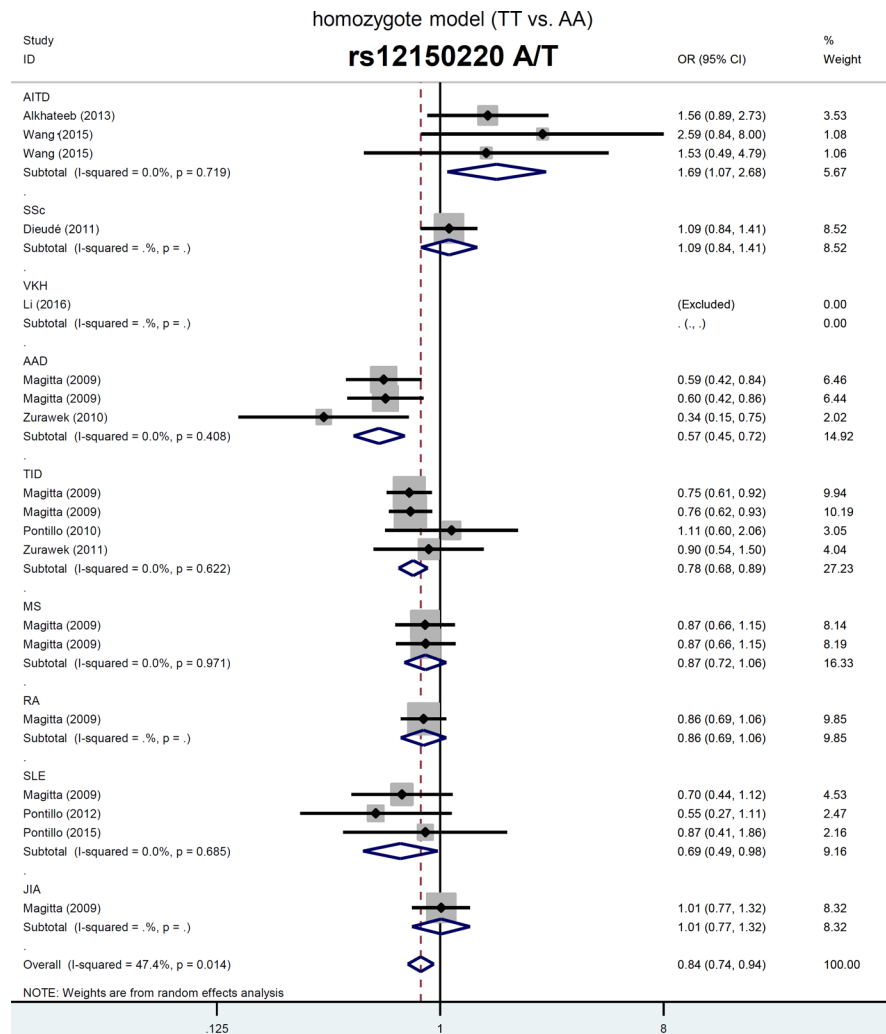

**Supplementary Figure 1: Forest plots of stratified analyses by disease type for NLRP1 rs12150220, and susceptibility to vitiligo-associated autoimmune diseases under homozygote model.**

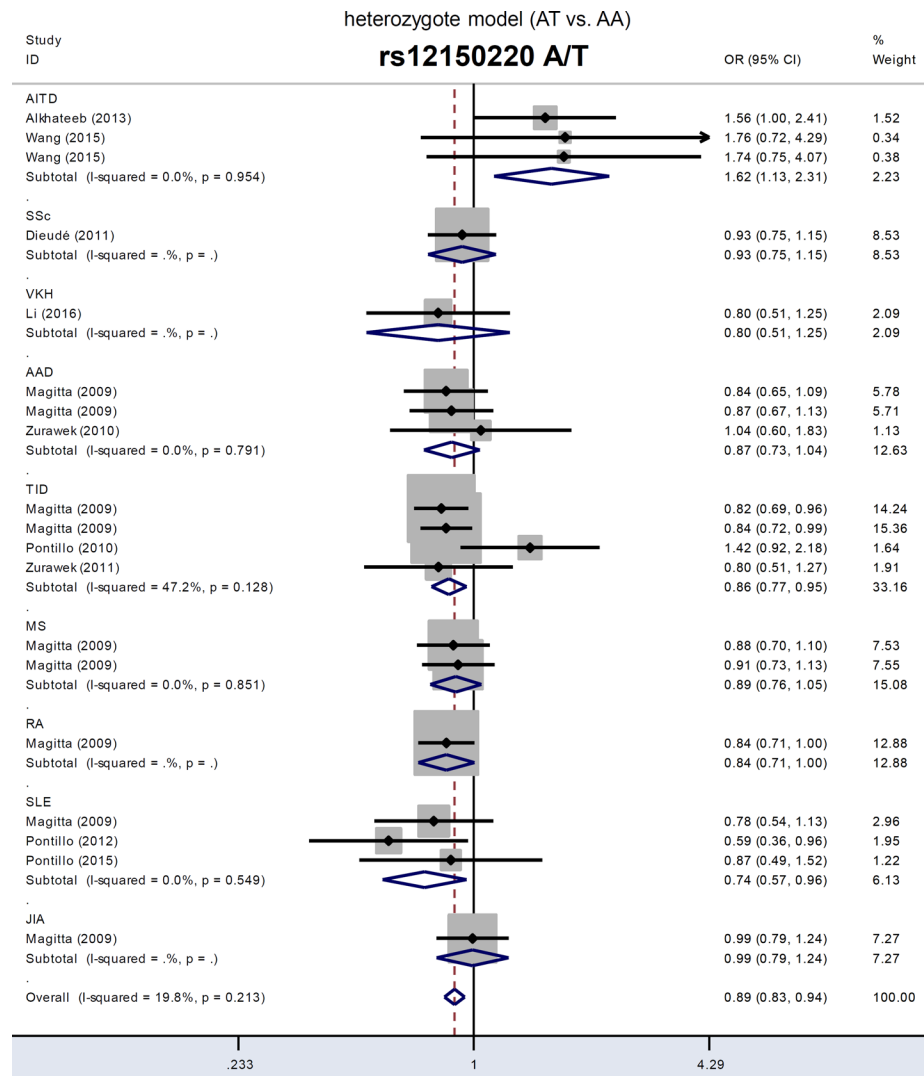

**Supplementary Figure 2: Forest plots of stratified analyses by disease type for NLRP1 rs12150220, and susceptibility to vitiligo-associated autoimmune diseases under heterozygote model.**

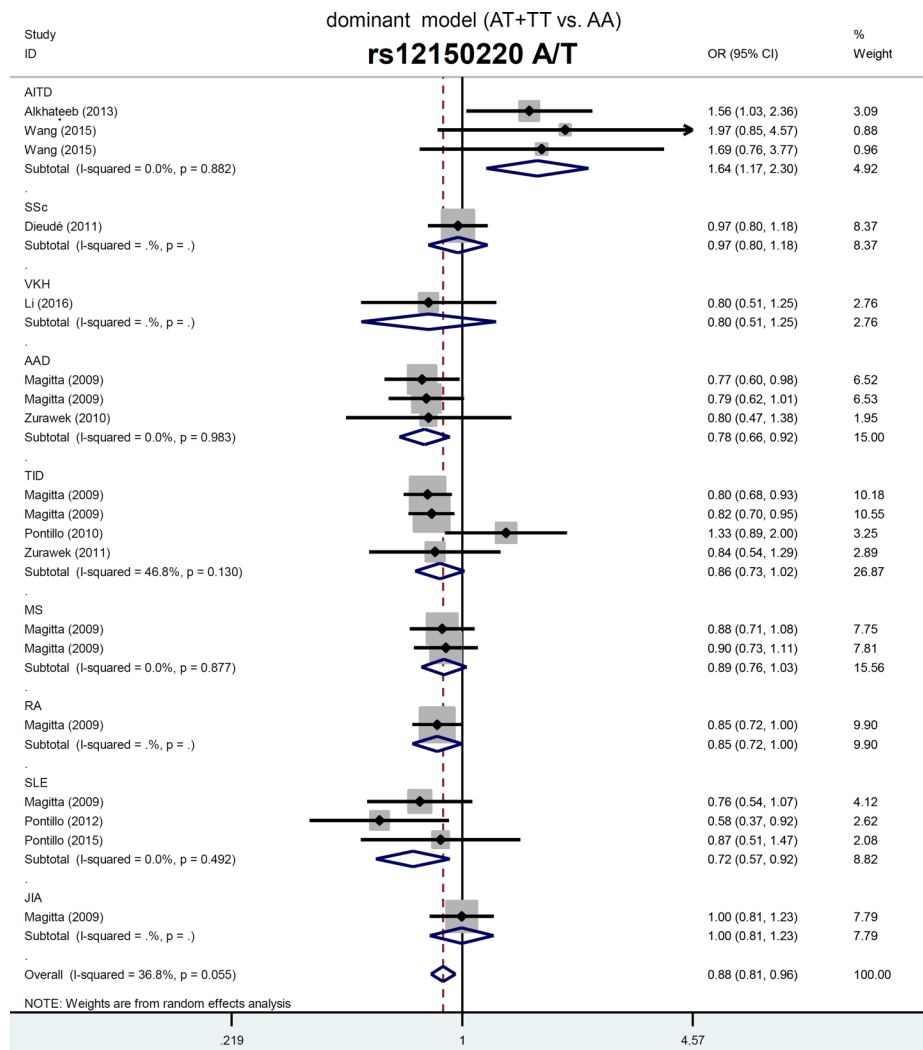

**Supplementary Figure 3: Forest plots of stratified analyses by disease type for NLRP1 rs12150220, and susceptibility to vitiligo-associated autoimmune diseases under dominant model.**

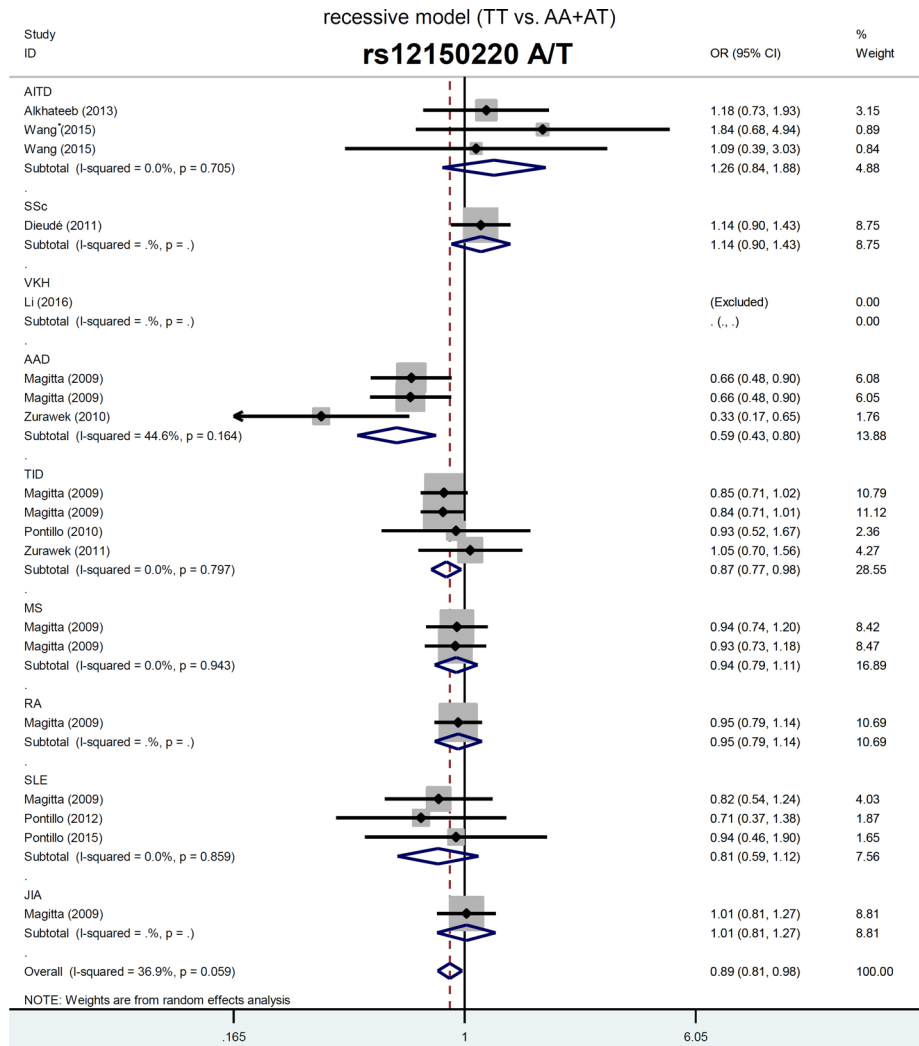

**Supplementary Figure 4: Forest plots of stratified analyses by disease type for NLRP1 rs12150220 and susceptibility to vitiligo-associated autoimmune diseases under recessive model.**

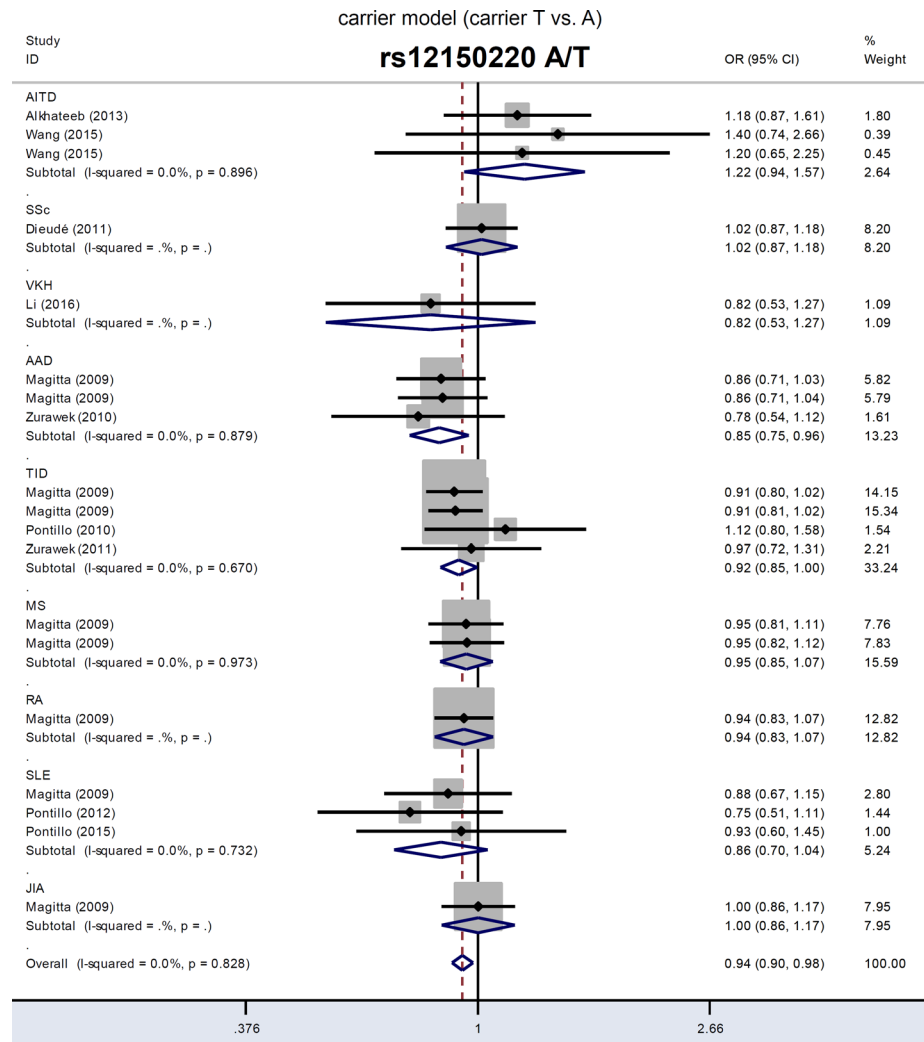

**Supplementary Figure 5: Forest plots of stratified analyses by disease type for NLRP1 rs12150220, and susceptibility to vitiligo-associated autoimmune diseases under carrier model.**

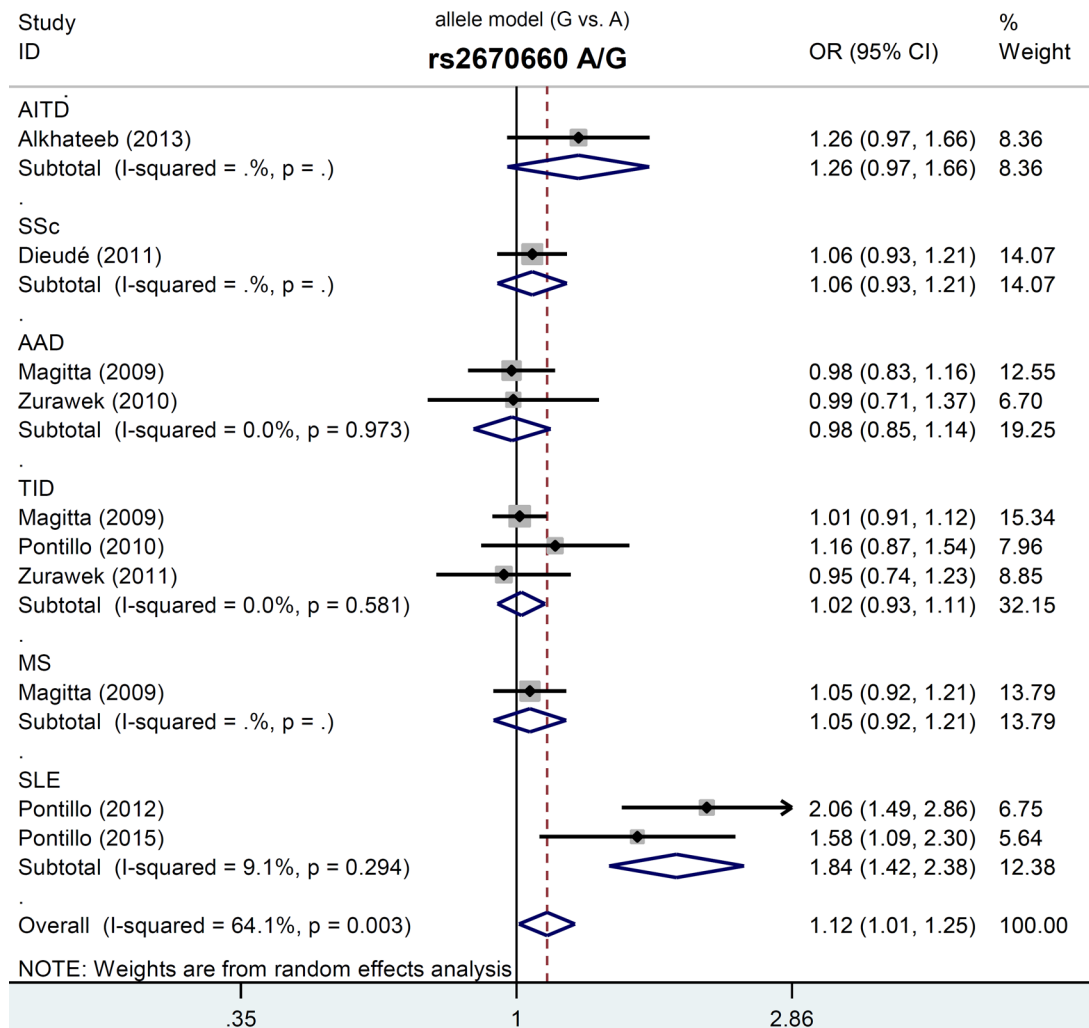

**Supplementary Figure 6: Forest plots of stratified analyses by disease type for NLRP1 rs2670660, and susceptibility to vitiligo-associated autoimmune diseases under allele model.**

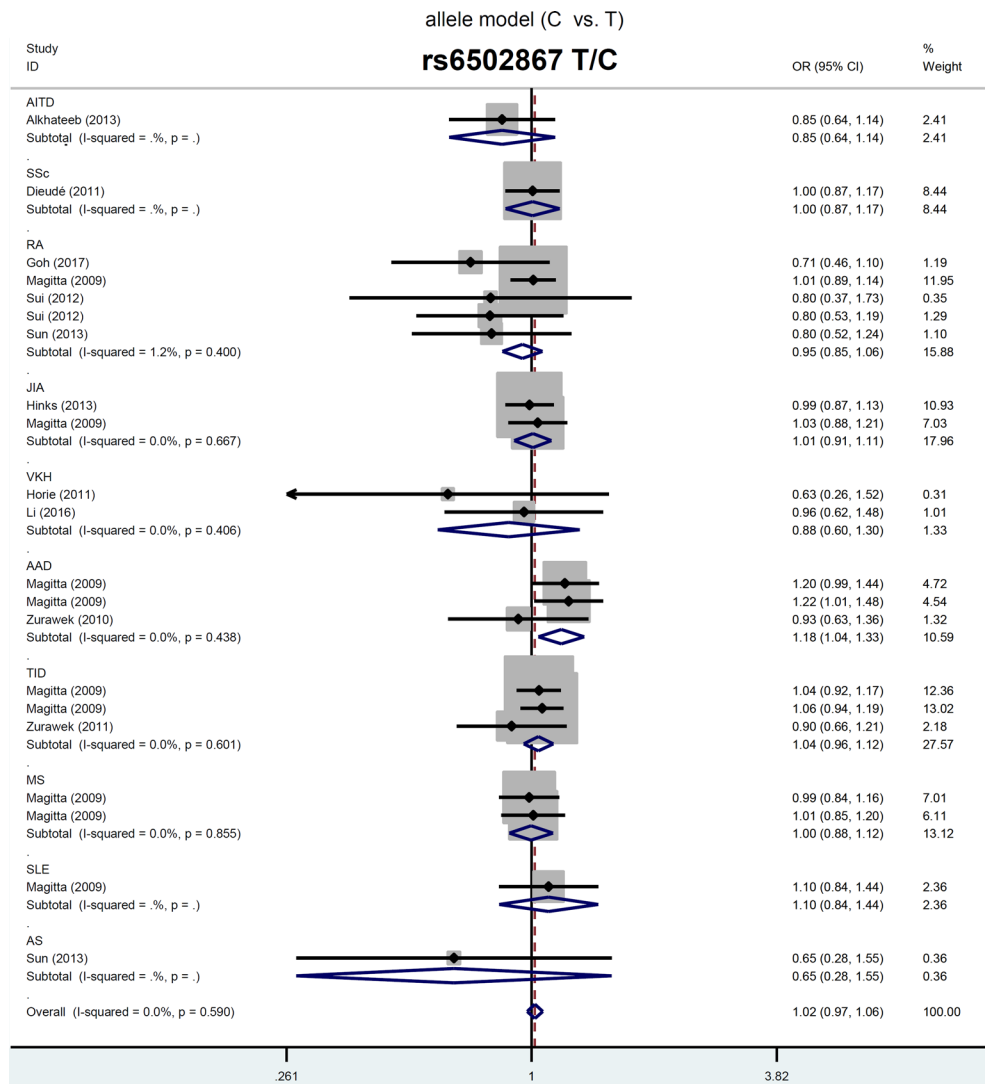

**Supplementary Figure 7: Forest plots of stratified analyses by disease type for NLRP1 rs6502867, and susceptibility to vitiligo-associated autoimmune diseases under allele model.**
